# Supplementary material for: Unsupervised Hierarchical Clustering of Pancreatic Adenocarcinoma Dataset from TCGA Defines a Mucin Expression Profile that Impacts Overall Survival
Source: MDPI journal article supplement (doi:10.3390/cancers12113309), 2020-11-09
Supplement: s1 [file s1]

## Supplementary Materials

### A - Membrane bound mucins

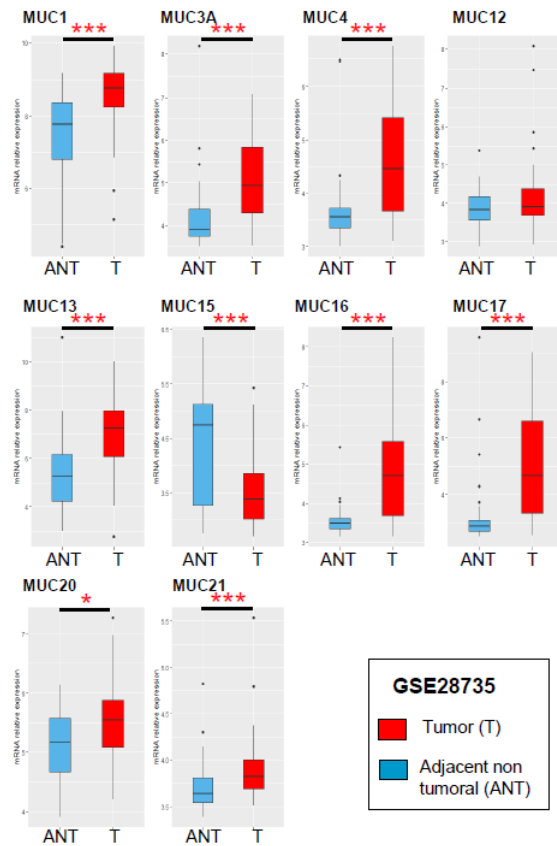

### B - Secreted mucins

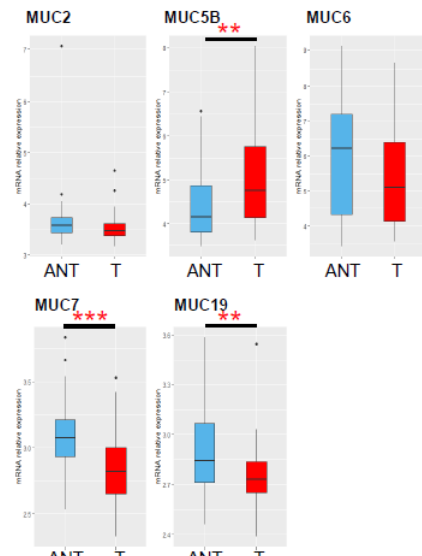

### C - Atypical mucins

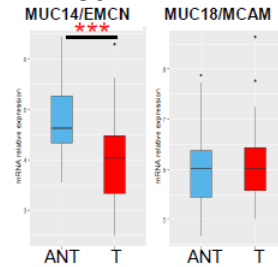

Supplemental Figure 1

**Figure S1.** Mucin mRNA level in human tumor (T) and adjacent nontumor (ANT) tissues. (A) Membrane-bound mucin mRNA (*MUC1*, *MUC3A*, *MUC4*, *MUC12*, *MUC13*, *MUC15*, *MUC16*, *MUC17*, *MUC20*, and *MUC21*), secreted mucin mRNA (*MUC2*, *MUC5AC*, *MUC5B*, *MUC6*, *MUC7*, and *MUC19*), or atypical mucin mRNA (*MUC14/EMCN*, and *MUC18/MCAM*) expression was evaluated in PDAC datasets of the NCBI Gene Expression Omnibus (GEO, GSE28735) database to analyze whether the mRNA level differed between adjacent nontumor tissues and tumor tissues. Statistical analyses were performed using paired *t*-test (\*\* $p < 0.001$ , \*\*  $p < 0.01$ , \*  $p < 0.05$ ).

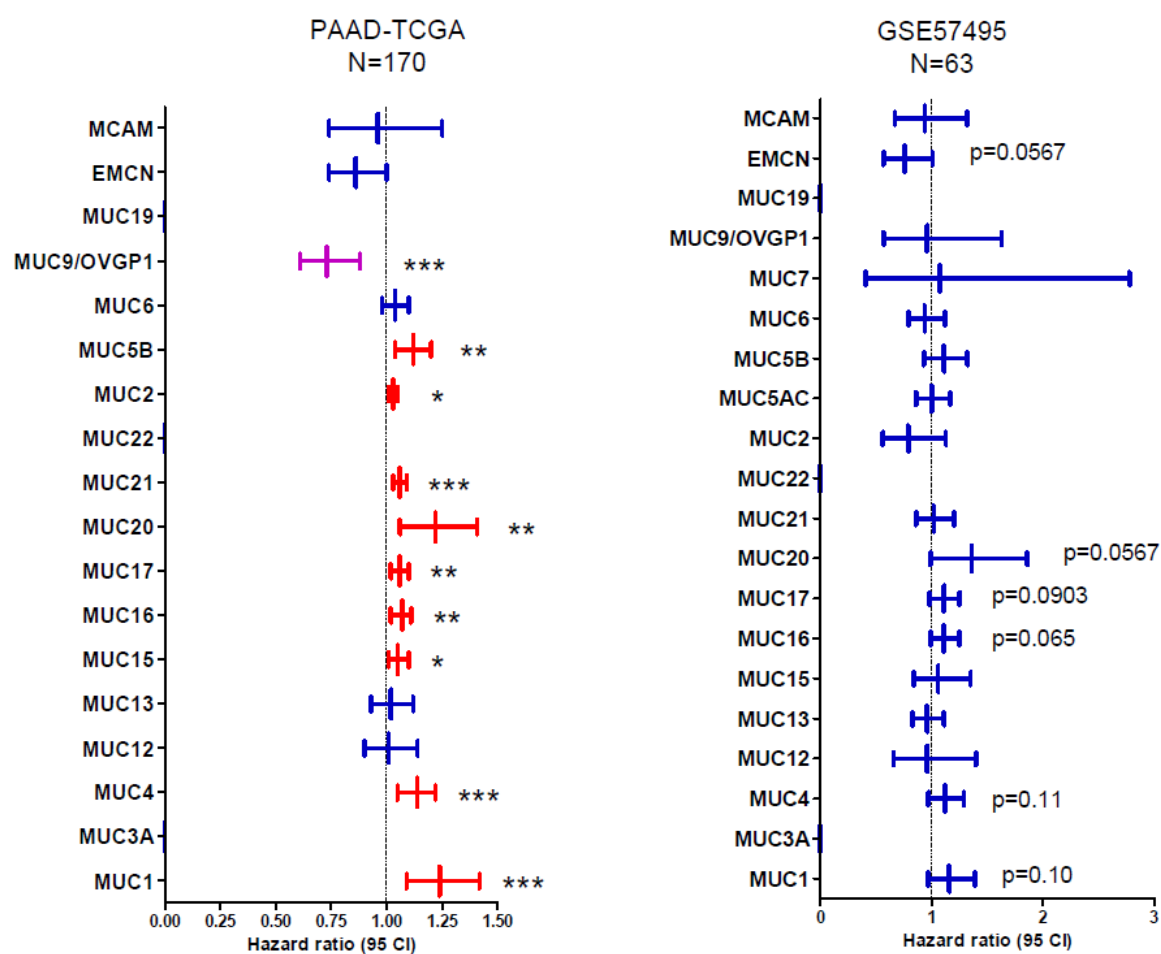

**Figure S2.** Mucin mRNA levels and hazard ratio in pancreatic adenocarcinoma PAAD and GSE57495 cohorts. Hazard ratio was evaluated using the PROGgeneV2 algorithm in PAAD-TCGA and GSE57495 datasets. Statistically significant hazard ratios ( $p < 0.05$ ) are represented in red (HR > 1) or purple (HR < 1). The  $p$ -values are indicated on the graph (\*\* $p < 0.001$ , \*\* $p < 0.01$ , \* $p < 0.05$ ).

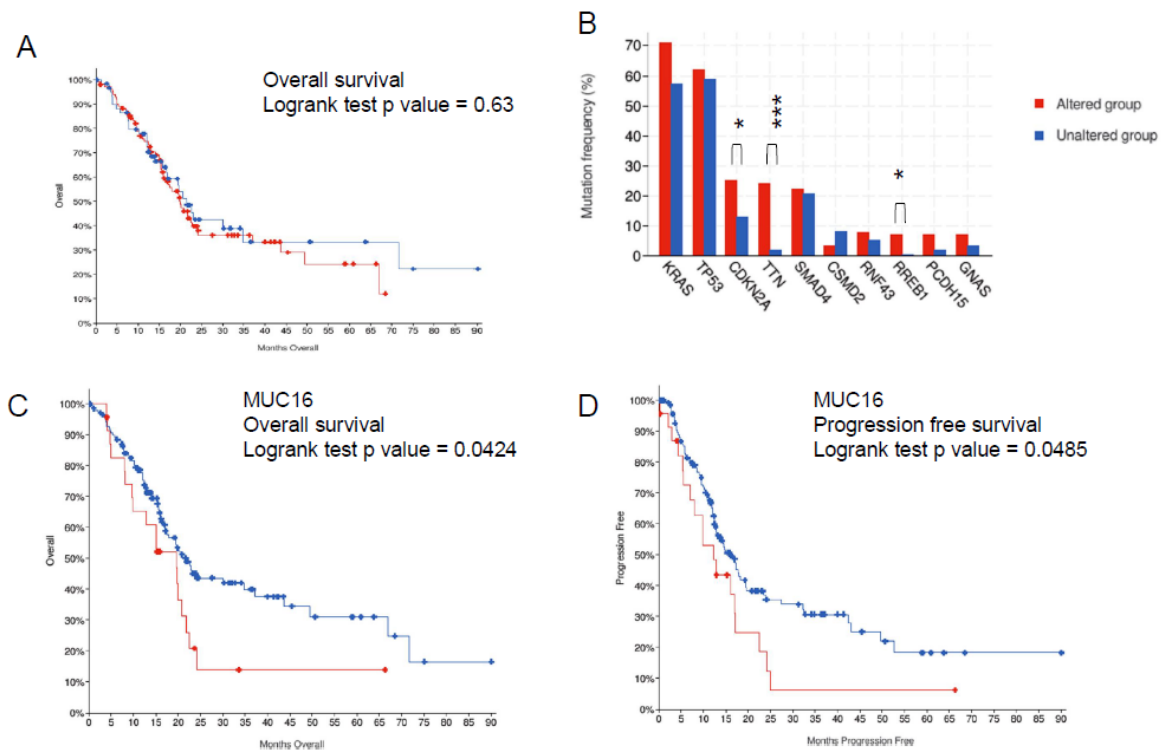

**Figure S3.** Analysis of overall survival and gene mutation in PAAD-TCGA patients with alterations of mucin genes. **(A)** Overall survival of PAAD-TCGA patients with at least one alteration event (amplification/deletion/high mRNA) of any mucin genes and nonaltered patients. **(B)** Comparison of most frequent gene mutation in PAAD-TCGA patients with at least one alteration of any mucin gene compared to nonaltered patients. Statistical analyses were performed using a paired *t*-test (\*\**p* < 0.001, \* *p* < 0.05). **(C)** Overall survival and **(D)** progression-free survival of PAAD-TCGA patients with at least one alteration event of MUC16 (*n* = 23) and nonaltered patients.

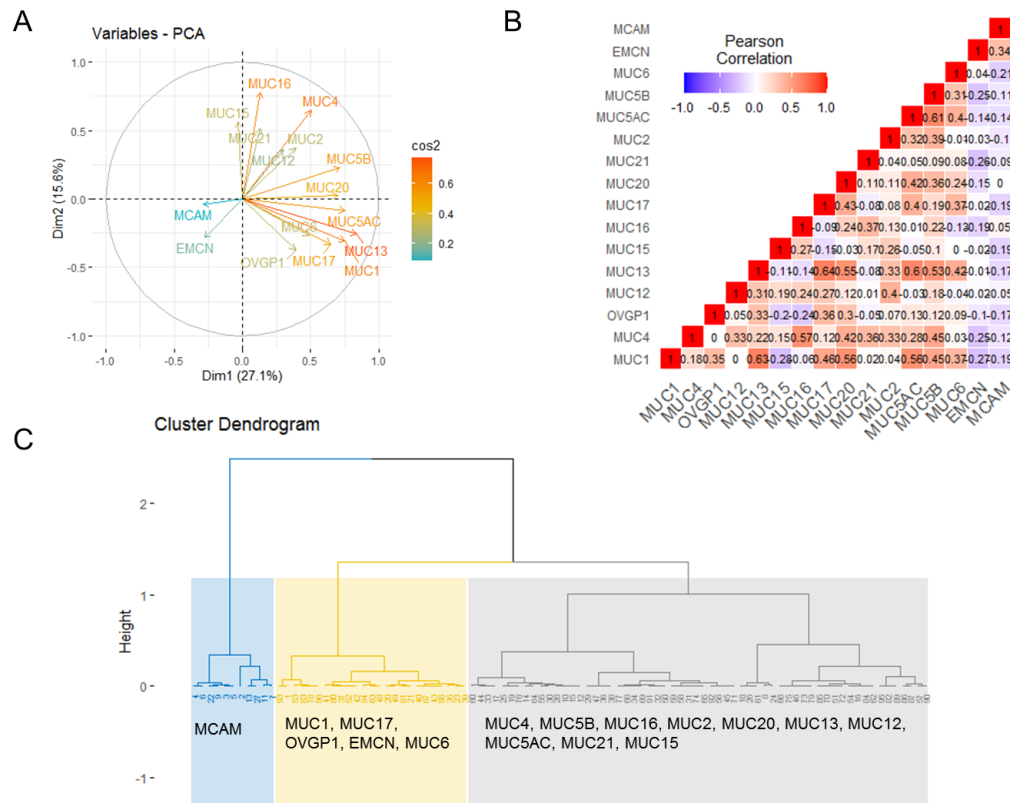

**Figure S4:** Correlation analysis of relative mucin mRNA levels in the independent QCMG pancreatic adenocarcinoma dataset. (A) Principal component analysis of mucin mRNA relative expression in QCMG cohort. (B) Correlation Pearson  $r$  values were calculated for each mucin mRNA combination from the QCMG cohort. (C) Unsupervised hierarchical clustering analysis of PDAC patients according to their relative mucin mRNA expression.

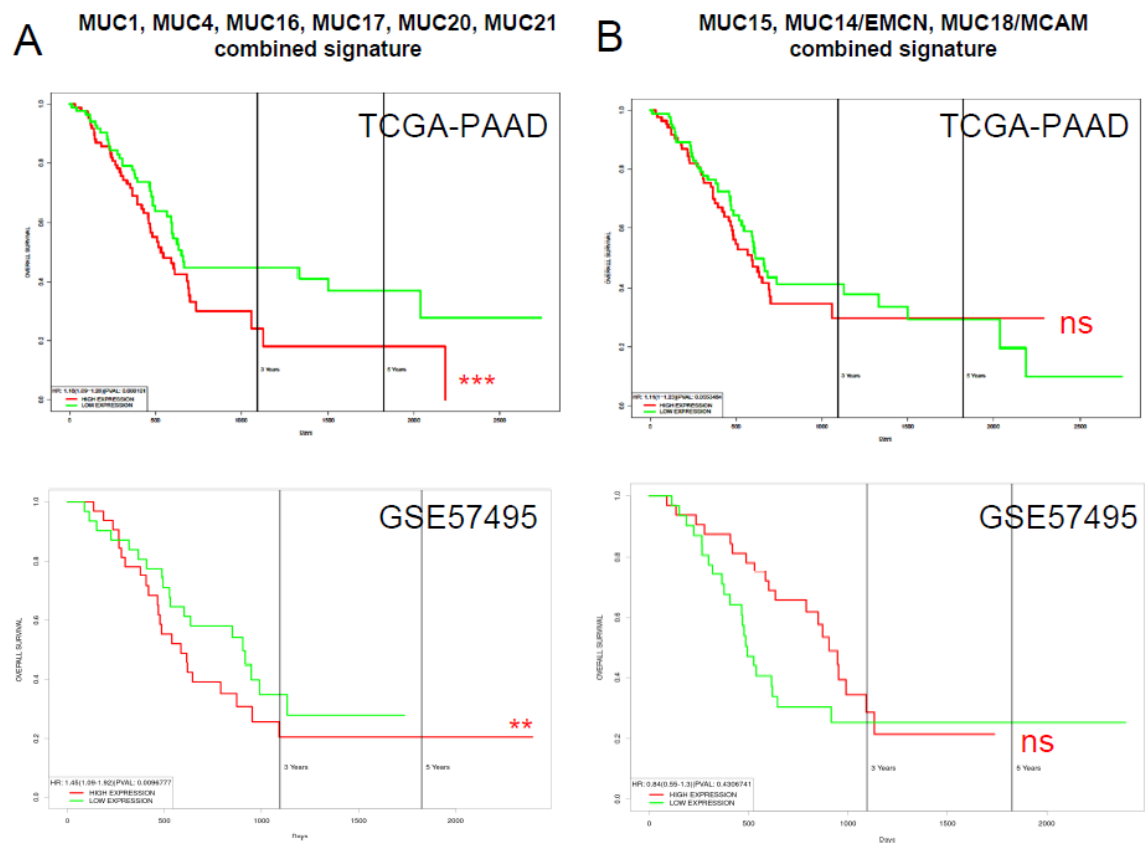

**Figure S5.** Analysis of overall survival of the #1 and #2 mucin signatures in pancreatic cancer datasets using PROGgeneV2. (A) Pancreatic cancer patients were stratified using a gene signature combining *MUC1*, *MUC4*, *MUC16*, *MUC17*, *MUC20*, and *MUC21*. Kaplan–Meier curves were analyzed with the PROGgeneV2 tool in the PAAD-TCGA and GSE57495 datasets. (B) PAAD patients were stratified using a gene signature combining *MUC15*, *MUC14/EMCN*, and *MUC18/MCAM* in PAAD-TCGA and GSE57495 datasets.

**Table S1.** Correlation of mucin gene expression in pancreatic adenocarcinoma QCMG dataset ( $p < 0.05$ ). A total of 96 mRNA transcriptome samples were available.

| Gene A               | Positive correlation |             | $p$ -value |
|----------------------|----------------------|-------------|------------|
|                      | Gene B               | Pearson $r$ |            |
| MUC13                | MUC17                | 0.64        | 0.00000    |
| MUC1                 | MUC13                | 0.63        | 0.00000    |
| MUC5AC               | MUC5B                | 0.61        | 0.00000    |
| MUC13                | MUC5AC               | 0.60        | 0.00000    |
| MUC4                 | MUC16                | 0.57        | 0.00000    |
| MUC1                 | MUC20                | 0.56        | 0.00000    |
| MUC1                 | MUC5AC               | 0.56        | 0.00000    |
| MUC13                | MUC20                | 0.55        | 0.00000    |
| MUC13                | MUC5B                | 0.53        | 0.00000    |
| MUC1                 | MUC17                | 0.46        | 0.00000    |
| MUC4                 | MUC5B                | 0.45        | 0.00000    |
| MUC1                 | MUC5B                | 0.45        | 0.00001    |
| MUC17                | MUC20                | 0.43        | 0.00001    |
| MUC4                 | MUC20                | 0.42        | 0.00002    |
| MUC20                | MUC5AC               | 0.42        | 0.00002    |
| MUC13                | MUC6                 | 0.42        | 0.00002    |
| MUC5AC               | MUC6                 | 0.40        | 0.00005    |
| MUC12                | MUC2                 | 0.40        | 0.00006    |
| MUC17                | MUC5AC               | 0.40        | 0.00007    |
| MUC2                 | MUC5B                | 0.39        | 0.00009    |
| MUC16                | MUC21                | 0.37        | 0.00019    |
| MUC1                 | MUC6                 | 0.37        | 0.00019    |
| MUC17                | MUC6                 | 0.37        | 0.00022    |
| MUC4                 | MUC21                | 0.36        | 0.00027    |
| OVGP1                | MUC17                | 0.36        | 0.00032    |
| MUC20                | MUC5B                | 0.36        | 0.00034    |
| MUC1                 | OVGP1                | 0.35        | 0.00042    |
| EMCN                 | MCAM                 | 0.34        | 0.00069    |
| OVGP1                | MUC13                | 0.33        | 0.00094    |
| MUC4                 | MUC12                | 0.33        | 0.00098    |
| MUC4                 | MUC2                 | 0.33        | 0.00104    |
| MUC13                | MUC2                 | 0.33        | 0.00104    |
| MUC2                 | MUC5AC               | 0.32        | 0.00165    |
| MUC5B                | MUC6                 | 0.31        | 0.00180    |
| MUC12                | MUC13                | 0.31        | 0.00203    |
| OVGP1                | MUC20                | 0.30        | 0.00340    |
| MUC4                 | MUC5AC               | 0.28        | 0.00623    |
| MUC12                | MUC17                | 0.27        | 0.00676    |
| MUC15                | MUC16                | 0.27        | 0.00774    |
| MUC15                | MUC2                 | 0.26        | 0.01001    |
| MUC16                | MUC20                | 0.24        | 0.01868    |
| MUC20                | MUC6                 | 0.24        | 0.01950    |
| MUC12                | MUC16                | 0.24        | 0.02001    |
| MUC4                 | MUC13                | 0.22        | 0.03362    |
| MUC16                | MUC5B                | 0.22        | 0.03414    |
| Negative correlation |                      |             |            |
| MUC1                 | MUC15                | -0.28       | 0.00659    |
| MUC1                 | EMCN                 | -0.27       | 0.00900    |
| MUC21                | EMCN                 | -0.26       | 0.00984    |
| MUC4                 | EMCN                 | -0.25       | 0.01251    |
| MUC5B                | EMCN                 | -0.25       | 0.01599    |
| OVGP1                | MUC16                | -0.24       | 0.01948    |
| MUC6                 | MCAM                 | -0.21       | 0.04039    |
